1  
2  
3  
4  
5  
6  
7  
8  
9  
10  
11  
12  
13  
14  
15  
16  
17  
18  
19  
20  
21  
22

## The Data Burden of Digital Learning

Rachel Umoren<sup>1\*</sup>, Ime Asangansi<sup>2</sup>, Dillon Afenir<sup>3</sup>, Brian W. Bresnahan<sup>5</sup>, Annabelle Kotler<sup>1</sup>,  
Cailin White<sup>1</sup>, Matt Cook<sup>1</sup>, Casey Lowman<sup>4</sup>, Sara Berkelhamer<sup>1</sup>

<sup>1</sup> Department of Pediatrics, Division of Neonatology, University of Washington, Seattle, WA,

USA

<sup>2</sup> EHealth4Everyone, Abuja, Nigeria

<sup>3</sup> Department of Economics, University of Washington, Seattle, WA, USA

<sup>4</sup> American Academy of Pediatrics, Itasca, IL, USA

<sup>5</sup> Department of Radiology, University of Washington, Seattle, WA, USA

\*Corresponding author: Rachel A. Umoren, 1959 NE Pacific St, Box 356320, Seattle, Washington 98195, email: [rumoren@uw.edu](mailto:rumoren@uw.edu)

RU and IA conceptualized and designed the study, drafted the initial manuscript, designed the data collection tools and reviewed and revised the manuscript. IA, DA and BB collected data and carried out the initial analyses and reviewed and revised the manuscript. SB, MC, AK, CL, and CW critically reviewed the manuscript for important intellectual content. All authors participated in the revision of the manuscript, approved the final version and agreed to be accountable for all aspects of the work.

## 23 **Abstract**

24           The costs of participating in training programs that rely on video conferencing vary by  
25 mechanics of use and the specific platform. We proposed practical solutions to limiting costs in  
26 low resource settings with the use of video conferencing calls. Scenarios in which facilitators  
27 have their video on and expect learners to participate with continuous video result in the greatest  
28 data burden, while use of intermittent video by both facilitator and learners can significantly  
29 lower data use, and thus costs. The choice of a platform also impacts teleprogramming, with  
30 creative options for use of lower cost platforms to reduce participant and training organization  
31 costs. These might include sharing educational content or video via chat groups and limiting  
32 conference to audio alone. In the context of COVID-19 where virtual meetings have become  
33 prevalent, it is critical that data burden is considered by program directors and funders. Looking  
34 forward, hybrid training that includes virtual and in-person training will likely become the norm  
35 in global health settings, but achieving this model will still require thoughtful consideration of  
36 data costs. Further, our findings are relevant to many other fields and advocate for evaluation of  
37 costs and data burden along with the growing use of teleprogramming in these settings.

## 38 **Author Summary**

39           The COVID-19 pandemic restricted travel and in-person gatherings. These restrictions  
40 also impacted access to important in-person training programs for healthcare workers, especially  
41 in areas where financial resources are limited. However, one positive impact of the pandemic has  
42 been improved access and experience with video conferencing tools (like Zoom) for many  
43 healthcare training programs. These video conferencing tools provide a way to complete  
44 essential training when in-person options may be limited. However, video-based training can

45 have significant costs including internet data costs, mobile device costs, and healthcare worker  
46 professional time. Our study examined the data costs associated with video conferencing using  
47 several video conferencing applications across 5,554 mobile data plans in 228 countries. We  
48 found that costs are highest when trainers have their video on and learners participate with video  
49 on throughout the training. Intermittent video use by both trainers and learners can significantly  
50 lower costs. We also found that using lower-cost video-conferencing tools may help reduce  
51 costs. Additionally, there are training methods that can reduce costs including sharing  
52 educational content or video via chat groups and limiting conferences to audio only. Virtual  
53 training is a powerful and common tool in healthcare settings, but it is essential to consider costs,  
54 especially in areas with limited resources.

## 55 **Introduction**

56 The COVID-19 pandemic has resulted in restrictions to travel and in-person gathering  
57 and reduced resources for training healthcare workers, particularly those in resource-scarce  
58 settings. At the same time, the increasing availability and accessibility of video conferencing  
59 platforms has led to their widespread use in local training events and national conferences.  
60 Initially, video conferencing could only be used by large organizations who could invest in  
61 devices, infrastructure and personnel to implement an on-premise solution that was made  
62 available to employees working on site. However, video conferencing systems are now widely  
63 available and accessible on a variety of devices including personal computers, smartphones,  
64 tablets, and even augmented reality headsets. Cloud videoconferencing solutions such as Zoom,  
65 Webex, Go-to-Meeting, Join.me, Telegram, Viber, WhatsApp, Team Viewer, and Microsoft  
66 Teams provide the essential video infrastructure as a fully supported hosted service. Many of  
67 these solutions also offer free services that allow video conferences between a limited number of

68 participants for a finite duration, e.g. 45 minutes with participants using their own devices and  
69 paying for internet data costs. These solutions provide an option for delivering remote training  
70 when in-person options may be limited.

71 In healthcare settings, tele-education sessions may take the form of tele-mentoring  
72 guidance on the management of actual clinical cases or tele-simulation training [1-6]. Tele-  
73 simulation has been described in neonatal resuscitation training for healthcare workers in high  
74 and low resource settings [2, 7-8]. The Helping Babies Survive curriculum developed by the  
75 American Academy of Pediatrics is an evidence-based training curriculum that utilizes  
76 simulation principles to teach the steps of neonatal resuscitation and the routine care of small and  
77 sick newborns. The curriculum was designed for in-person facilitation, but also has been  
78 administered virtually to remote learners [8-9].

79 Some of the most visible demonstrations of tele-mentoring emerged from Project  
80 Extension for Community Healthcare Outcomes (ECHO), also known as Project ECHO, which  
81 utilizes tele-education to bridge knowledge gaps between specialists at academic health centers  
82 and primary care providers from remote areas [10]. The Project ECHO model expanded access  
83 to tele-mentoring through creating a virtual knowledge network on a range of topics related to  
84 care for patients. The first ECHO project linked university specialists with rural and prison-based  
85 clinicians to improve care for people with chronic hepatitis in New Mexico [11]. The concepts of  
86 tele-mentoring have also been applied to procedural training in surgical care [12-14] and are  
87 likely to have broad application to any field where skills training is required.

88 The cost considerations for digital training include internet data costs, mobile device  
89 costs and healthcare worker professional time. Many institutions are willing to support  
90 healthcare worker professional time to participate in training events and it is common for

91 learners to own or have access to a mobile device. However, individuals in rural areas or low  
92 resource settings may not be able to access reliable broadband internet due to limited  
93 connectivity or high data costs. Despite the expansion of tele-simulation and tele-mentoring  
94 programs, little is known about the data costs to funding agencies and end-users. These expenses  
95 need to be taken into consideration as interest in delivery of remote training and mentoring  
96 grows in response to complex social and health demands as well as advancing technology.

## 97 **Methods**

98 To assess data costs associated with digital training, two devices (an iPhone 7 and a  
99 Samsung Galaxy Note 8) were connected by video conference call for a 36-minute test period.  
100 All background apps and updates were disabled to accurately assess data use. Device A hosted  
101 the call and had video enabled throughout the test period (“continuous”) while Device B had  
102 video enabled for 2 minutes in 10 minutes intervals (“intermittent”). The test was performed for  
103 four platforms: Zoom, Webex, MS Teams and WhatsApp. The evaluation was performed with  
104 WIFI internet service and repeated using the dedicated sims of the two devices with a local  
105 mobile network provider (Globacom Nigeria). The bandwidth was monitored in real time using  
106 the MikroTik Userman hotspot monitor application to determine total data download and total  
107 data upload during the call for each device. Results were normalized to 60 minutes of use and the  
108 total time estimated for completing an essential newborn care provider course (approximated as  
109 12 hours). Published country specific data on GB were accessed for analysis from:  
110 <https://www.cable.co.uk/mobiles/worldwide-data-pricing/>. These data were compiled from 5,554  
111 mobile data plans in 228 countries (2020). The average cost of one gigabyte (1GB) was  
112 calculated and normalized to US dollars. Salary estimates were obtained from the Economic  
113 Research Institute (<https://salaryexpert.com>) and are based on salary survey data collected

114 directly from employers and anonymous employees. Using the job description “registered  
115 nurse”, we conducted a search for the median hourly wage in each country and then converted  
116 the figures to 2021 USD.

## 117 **Results**

### 118 **Data costs by country and region**

119 The average cost of data as normalized to the price of 1 GB in USD varies greatly by  
120 country and region, ranging from 0.09 to 52.20 USD in 2020. Gross national income per capita  
121 also ranges nearly 500-fold from 280-117730 USD in 2019. Heat maps demonstrate that cost of  
122 data does not always parallel GNI (Fig 1). Cost analysis by region identified wide range with the  
123 highest (high) cost in Northern Africa and the lowest (low) cost in Asia and the CIS (USSR)  
124 (Table 1). The median of the average cost of 1GB across all regions was \$3.42. The highest  
125 average cost of 1GB of data was in North America at \$14/GB while the lowest average cost was  
126 in Northern Africa at \$2/GB.

127

128 **Figure 1a. Average price of 1GB of data (USD)**

129 **Figure 1b. Gross national income per capita**

130

131 **Table 1. Regional Cost Ranges for 1GB of Data in U.S. Dollars**

| <b>Continental<br/>Region</b>   | <b>Plans measured</b> | <b>Low cost (1GB)<br/>USD</b> | <b>High cost (1GB)<br/>USD</b> | <b>Average cost<br/>(1GB) USD</b> |
|---------------------------------|-----------------------|-------------------------------|--------------------------------|-----------------------------------|
| <i>Asia (Ex.<br/>Near East)</i> | 897                   | 0.01                          | 89.42                          | 2.28 ± 3.56                       |

|                           |      |      |         |              |
|---------------------------|------|------|---------|--------------|
| <i>Baltics</i>            | 52   | 0.36 | 18.44   | 2.31 ± 3.56  |
| <i>Caribbean</i>          | 492  | 0.17 | 195.3   | 7.19 ± 3.56  |
| <i>Central America</i>    | 202  | 0.5  | 55.56   | 3.24 ± 3.56  |
| <i>CIS (USSR)</i>         | 236  | 0.01 | 23.75   | 2.16 ± 3.56  |
| <i>Eastern Europe</i>     | 392  | 0.03 | 156.78  | 3.42 ± 3.56  |
| <i>Near East</i>          | 371  | 0.06 | 180     | 4.46 ± 3.56  |
| <i>North America</i>      | 113  | 1.78 | 99.68   | 14.71 ± 3.56 |
| <i>Northern Africa</i>    | 143  | 0.16 | 1140.07 | 2.06 ± 3.56  |
| <i>Oceania</i>            | 345  | 0.28 | 143.35  | 7.85 ± 3.56  |
| <i>South America</i>      | 415  | 0.23 | 195.3   | 5.8 ± 3.56   |
| <i>Western Europe</i>     | 740  | 0.09 | 108.39  | 3.13 ± 3.56  |
| <i>Sub-Saharan Africa</i> | 1156 | 0.15 | 212.9   | 6.91         |

132

## 133 **Data burden by connectivity and platform**

134 To determine relative costs associated with use of variable platforms, the upload and  
 135 download data use was determined modeling three typical training scenarios: 1) Continuous

136 video for both facilitator and participant; 2) Continuous video for facilitator and intermittent  
137 video for participant; and 3) Intermittent video for both facilitator and participant. Representative  
138 platforms were assessed including Zoom, Webex (in high and low definition), Microsoft (MS)  
139 Teams and WhatsApp (Table 2).

140

141 **Table 2. Comparison of Data Burden Associated with Variable Platforms and Continuous**  
142 **versus Intermittent Video Use**

143 **Scenario 1: Continuous Video for Both Facilitator and Participant**

| <b>Platform</b>    | <b>1 hour<br/>virtual<br/>meeting<br/>GB</b> | <b>12h ENC<br/>course<br/>GB</b> | <b>ECHO project<br/>(8 hours immersion training plus<br/>2h/month for 6 months)<br/>GB</b> |
|--------------------|----------------------------------------------|----------------------------------|--------------------------------------------------------------------------------------------|
| Zoom               | 1.09                                         | 13.14                            | 21.86                                                                                      |
| HD-Webex           | 1.09                                         | 13.10                            | 21.82                                                                                      |
| Non-HD<br>Webex    | 0.99                                         | 12.00                            | 19.92                                                                                      |
| Microsoft<br>Teams | 0.77                                         | 9.28                             | 15.44                                                                                      |
| WhatsApp           | 0.35                                         | 4.22                             | 7.02                                                                                       |

**Scenario 2: Continuous Video for Facilitator/Intermittent Video for  
Participant**

---



| <b>Platform</b>    | <b>1 hour<br/>virtual<br/>meeting<br/>GB</b> | <b>12h ENC<br/>provider<br/>course<br/>GB</b> | <b>ECHO project<br/>(8 hours immersion training plus<br/>2h/month for 6 months)<br/>GB</b> |
|--------------------|----------------------------------------------|-----------------------------------------------|--------------------------------------------------------------------------------------------|
| Zoom               | 0.54                                         | 6.51                                          | 11.37                                                                                      |
| HD-Webex           | 0.53                                         | 6.37                                          | 10.61                                                                                      |
| Non-HD<br>Webex    | 0.47                                         | 5.65                                          | 9.41                                                                                       |
| Microsoft<br>Teams | 0.39                                         | 4.70                                          | 7.82                                                                                       |
| Whatsapp           | 0.16                                         | 2.03                                          | 3.31                                                                                       |

**Scenario 3: Intermittent Video for Facilitator and Participant**

| <b>Platform</b> | <b>1 hour<br/>virtual<br/>meeting<br/>GB</b> | <b>12h ENC<br/>provider<br/>course<br/>GB</b> | <b>ECHO project<br/>(8 hours immersion training plus<br/>2h/month for 6 months)<br/>GB</b> |
|-----------------|----------------------------------------------|-----------------------------------------------|--------------------------------------------------------------------------------------------|
| Zoom            | 0.12                                         | 1.43                                          | 2.39                                                                                       |
| HD-Webex        | 0.13                                         | 1.55                                          | 2.59                                                                                       |
| Non-HD<br>Webex | 0.12                                         | 1.45                                          | 2.41                                                                                       |

|           |      |      |      |
|-----------|------|------|------|
| Microsoft |      |      | 2.27 |
| Teams     | 0.11 | 1.39 |      |
| Whatsapp  | 0.03 | 0.43 | 0.67 |

144

## 145 **Earning wage and data equivalence by country**

146 Average hourly wage for representative countries along with country specific GB costs  
147 were used to determine the relative number of work hours needed to cover the expense of  
148 participating in a 12-hour training session. These calculations identified a wide range, from  
149 greater than 4 hours in South Africa and Peru to less than 2 hours in Indonesia and Pakistan (Fig  
150 2).

151

152 **Figure 2. Estimated data cost for Zoom 12-hour course with continuous video by median**  
153 **hourly wage for a registered nurse**

154

## 155 **Discussion**

156 Tele-education and tele-mentoring programs have been widely utilized and are of  
157 growing interest with need to provide safe training and education during the COVID-19  
158 pandemic. With overburdened healthcare systems and restrictions on travel and in person  
159 gatherings, educators around the world have relied on online platforms to support international  
160 partnerships and to both, teach learners and provide clinical support through tele-mentoring [15-  
161 16]. Access to information and educational tools as well as challenges with internet access vary  
162 between urban and rural areas in high-income countries with even greater inequities in middle-  
163 to-low-income countries. Moreover, internet data costs vary significantly by country location in a

164 way that do not mirror gross national income per capita exacerbating inequities and creating  
165 barriers to participation in tele-education and tele-mentoring. While institutions in high income  
166 countries often provide their staff with free or low-cost accounts to enable access to full-featured  
167 versions of the video conferencing platforms, many platforms also offer free, but technically  
168 limited versions. Access to joining calls is typically without a fee for attendees. Despite the  
169 “free” access, the cost of data packages may limit attendees’ ability to participate, particularly  
170 those on limited or “pay-as-you-go” internet or mobile phone plans that are prevalent in low  
171 resource settings.

172 Our data identifies that attendee expenses may be reduced by limiting the use of video for  
173 both the facilitator and the attendee. We found, not surprisingly, that the projected data cost is  
174 directly proportional to the use of video. However, in many cases, video is required to highlight  
175 key points or to observe performance of simulated procedures such as positive pressure  
176 ventilation during training in neonatal resuscitation or clinical findings with tele-mentoring. File  
177 compression or alternative sharing mechanisms may be helpful in the future. We found that costs  
178 could be limited significantly in scenarios where video was only used for brief periods of time by  
179 both the facilitator and the attendee. In a scenario where a dedicated interpreter might be  
180 required, the costs to the participant should be minimal if the interpreter does not share video.  
181 However, there will be a cost to the interpreter with use of video by both the facilitator and  
182 participant to provide adequate context to facilitate appropriate language interpretation.

183 Beyond limiting use of continuous video, alternative platforms which may have lower  
184 data burden due to differences in data encoding and transfer might be considered. We found that  
185 the use of Whatsapp [Meta] led to data costs that were one-third that of Zoom [Zoom  
186 Technologies]. However, there may be features that promote the use of one platform over

187 another including security, restrictions on number of participants, user familiarity, or the  
188 availability of certain built-in features such as interpreters. Data conservation strategies may also  
189 be important in ensuring continued access when band-width is limited. In some countries, the  
190 penetrance of broadband is reasonable, but when a larger number of people are working from  
191 home, internet capacity may buckle.

192 In addition, the impact of the data costs must be considered in proportion to income of  
193 the attendees. With the significant variability in costs across both high- and low-income  
194 countries, it cannot be assumed that costs will be proportional to earned income in those  
195 countries. The cost to the end-user must be taken into consideration by programs and institutions  
196 seeking to utilize video conferencing broadly for education or clinical uses. A range of ECHO  
197 tele-mentoring projects have focused on pain management, rheumatology, geriatrics,  
198 hypertension, diabetes, behavioral health and palliative care [10, 17-18] A systematic review by  
199 Zhou et al., (2016) included 39 studies addressing 17 medical conditions. While evaluation was  
200 often limited, there were instances in which this approach changed provider behaviors, changed  
201 patient outcomes and was cost effective. [11] As these programs address the needs of more  
202 connected learners globally, it is important to consider the costs to both facilitators and learners  
203 and to design training programs that help to minimize these costs. Funders must consider the  
204 costs of data in their plans for implementation of new programs or in the transition from  
205 primarily in-person interactions to interventions that use technology to deliver education and  
206 support.

207 Communications advancements that have aided faster connections through increasing  
208 available bandwidth and reduced network loading have improved both the quality and capacity  
209 of video conferences. Thousands of networked callers can now be accommodated in multi-site

210 meetings and conferences around the world. However, access to video conferencing platforms  
211 and reliable bandwidth to participate may vary. While tele-mentoring and tele-education might  
212 be assumed to represent distributed and equal access to education, application of these  
213 approaches in global health settings is complicated by structural variance in high- and low-  
214 income countries. Our study showed that there were significant differences between platforms  
215 and scenarios in terms of estimated data use which need to be taken into consideration where  
216 resources are limited.

217 Differences occur due to platform specific approaches to managing video and audio  
218 quality, bandwidth and security. Video standards or codecs determine the image quality and  
219 efficiency of video transmission within a program. A codec is a hardware or software-based  
220 process that compresses and decompresses large amounts of data used in voice over internet  
221 protocol video conferencing and streaming media. A codec takes data in one form, encodes it  
222 into another form and decodes it at the destination. Adaptive technologies deliver high quality  
223 video across networks with varying amounts of bandwidth. While some codecs send one video  
224 data stream for every resolution, frame rate and quality, others send just one stream that contains  
225 multiple layers of all the resolutions, frame rates and quality depending on what the devices and  
226 network that serve as the endpoints can support. This scalability supports meetings globally as  
227 each endpoint can select device and network-supported video resolution and quality without any  
228 additional encoding or decoding. The caller experiences an automatic degradation in the video  
229 quality when the network is busy while allowing the call to continue uninterrupted.

230 Platforms also differ with respect to security with many platforms employing encryption  
231 mechanisms to prevent unauthorized eavesdropping. However, higher levels of encryption can

232 result in larger files and delays in transmission in audio and video, particularly with limited  
233 bandwidth, representing a greater data burden.

234 Our study had several limitations. We conducted the tests in one low resource setting;  
235 repeating the evaluation in multiple settings may have yielded additional results. We used two  
236 common mobile\_device brands (iPhone and Samsung), but use of additional device types may  
237 have helped to provide more generalizability. We intentionally focused on the internet data costs  
238 and did not consider attendee time, platform, or device costs. These all need to be thoughtfully  
239 included in the design and implementation of programs.

## 240 **Conclusion**

241 The costs of participating in training programs that rely on video conferencing varies by  
242 location, mechanics of use, and the specific platform. We proposed practical solutions to limiting  
243 costs in low resource settings with the use of video conferencing calls. Scenarios in which  
244 facilitators have their video on and expect learners to participate with video on throughout result  
245 in the greatest data burden, while use of intermittent video by both facilitator and learners can  
246 significantly lower data use. The choice of a platform also impacts teleprogramming, with  
247 creative options for use of lower cost platforms to reduce costs. These might include sharing  
248 educational content or video via chat groups and limiting conference to audio alone. In the  
249 context of COVID-19 where virtual meetings have become prevalent, it is critical that data  
250 burden is adequately considered by program directors and funders. As hybrid virtual and in-  
251 person training become more common in global health settings, thoughtful consideration will  
252 need to be given to associated data costs. Our findings are relevant to many other fields and  
253 advocate for thoughtful evaluation of costs and data burden along with the growing use of  
254 teleprogramming in low resource settings.

255  
256  
257  
258  
259  
260  
261  
262  
263  
264  
265  
266  
267  
268  
269  
270  
271  
272  
273  
274  
275

## References

1. Bond, W. F., Barker, L. T., Cooley, K. L., Svendsen, J. D., Tillis, W. P., Vincent, A. L., et al. A Simple Low-Cost Method to Integrate Telehealth Interprofessional Team Members During In Situ Simulation. *Simul Healthc.* 2019; 14(2): 129.
2. Brei, B. K., Neches, S., Gray, M. M., Handley, S., Castera, M., Hedstrom, A., D’Cruz, et al. Telehealth Training During the COVID-19 Pandemic: A Feasibility Study of Large Group Multiplatform Telesimulation Training. *Telemed J E Health.* 2021; 27(10): 1166–1173.
3. Honda, R., & McCoy, C.E. Teledebriefing in Medical Simulation. PMID. 2022.
4. McCoy, C. E., Arabah, R., Weichmann, W., Langdorf, M. I., Ricks, C., Chakravarthy, B., et al. Feasibility of Telesimulation and Google Glass for Mass Casualty Triage Education and Training. *West J Emerg Med.* 2019; 20(3): 512–519.
5. Sartori, E., Tadiello, C., Secchi, C., & Muradore, R. Tele-Echography using a Two-Layer Teleoperation Algorithm with Energy Scaling. *ICRA.* 2019; 1569–1575.
6. Schlachta, C. M., Nguyen, N. T., Ponsky, T., & Dunkin, B. Project 6 Summit: SAGES telementoring initiative. *Surg Endosc.* 2016; 30(9): 3665–3672.
7. Jain, A., Agarwal, R., Chawla, D., Paul, V., & Deorari, A. Tele-education vs classroom training of neonatal resuscitation: A randomized trial. *J Perinatol.* 2010; 30(12): 773–779.
8. Jones-Bamman, C., Niermeyer, S., McConnell, K., Thomas, J.F., & Olson, C. Teaching Helping Babies Breathe Via Telehealth: A New Application in Rural Guatemala. *Biomed Hub.* 2019; 4(3): 1-6.

- 276 9. Sobelman, C., Richard, K., McQuilkin, P., & Fahey, N. Adapting Helping Babies Breathe  
277 into a Virtual Curriculum: Methods, Results, and Lessons Learned. *Glob Pediatr Health*.  
278 2021.
- 279 10. Zhou, C., Crawford, A., Serhal, E., Kurdyak, P., & Sockalingam, S. The Impact of  
280 Project ECHO on Participant and Patient Outcomes: A Systematic Review. *Acad Med*.  
281 2016; 91(10): 1439.
- 282 11. Arora, S., Thornton, K., Jenkusky, S. M., Parish, B., & Scaletti, J. V. Project ECHO:  
283 Linking University Specialists with Rural and Prison-Based Clinicians to Improve Care  
284 for People with Chronic Hepatitis C in New Mexico. *Public Health Rep*. 2007; 74–77.
- 285 12. Erridge, S., Yeung, D. K. T., Patel, H. R. H., & Purkayastha, S. Telementoring of  
286 Surgeons: A Systematic Review. *Surg Innov*. 2019; 26(1): 95-111.
- 287 13. Ponsky, T. A., Schwachter, M., Parry, J., Rothenberg, S., & Augestad, K. M.  
288 Telementoring: The Surgical Tool of the Future. *Eur J Pediatr Surg*. 2014; 24(4): 287–  
289 294.
- 290 14. Rosser, J. C., Fleming, J. P., Legare, T. B., Choi, K. M., Nakagiri, J., & Griffith, E.  
291 Design and Development of a Novel Distance Learning Telementoring System Using  
292 Off-the-Shelf Materials and Software. *Surg Technol Int*. 2017; 31: 41–49.
- 293 15. Daniel, M., Gordon, M., Patricio, M., Hider, A., Pawlik, C., Bhagdev, R., et al. An update  
294 on developments in medical education in response to the COVID-19 pandemic: A BEME  
295 scoping review: BEME Guide No. 64. *Med Teach*. 2021; 43(3): 253–271.
- 296 16. Diaz, M. C. G., & Walsh, B. M. Telesimulation-based education during COVID-19. *Clin*  
297 *Teach*. 2021; 18(2): 121–125.



- 298 17. Ball, S., Wilson, B., Ober, S., & Mchaourab, A. SCAN-ECHO for Pain Management:  
299 Implementing a Regional Telementoring Training for Primary Care Providers. *Pain Med.*  
300 2018; 19(2): 262–268.
- 301 18. Katzman, J. G., Galloway, K., Olivas, C., McCoy-Stafford, K., Duhigg, D., Comerci, G.,  
302 et al. Expanding Health Care Access Through Education: Dissemination and  
303 Implementation of the ECHO Model. *Mil Med.* 2016; 181(3): 227–235.

Figure 1a. Average price of 1GB of data (USD)

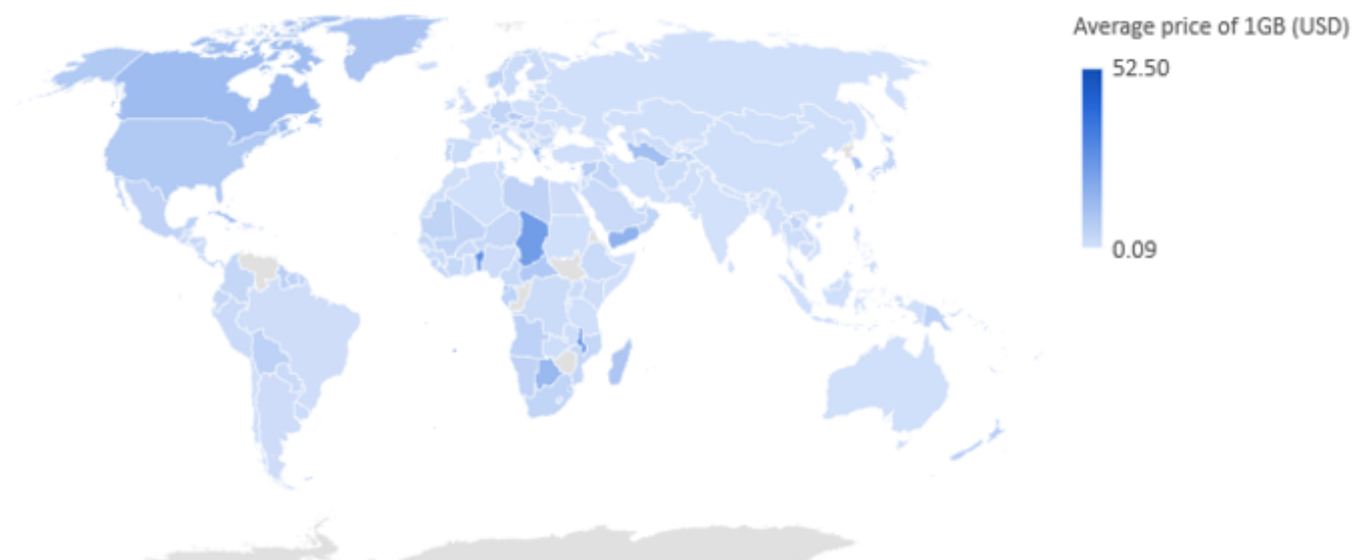

Figure 1b. Gross national income per capita

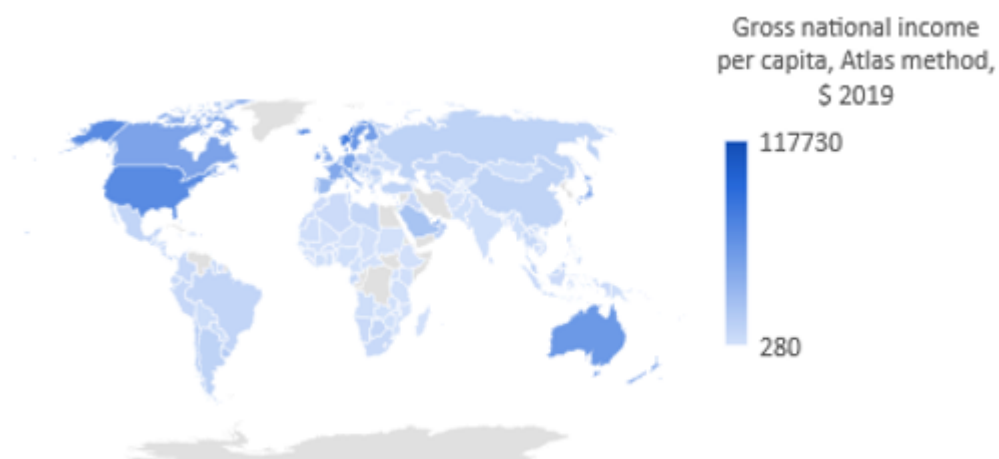

Figure 2. Estimated data cost for Zoom 12-hour course with continuous video by median hourly wage for a registered nurse

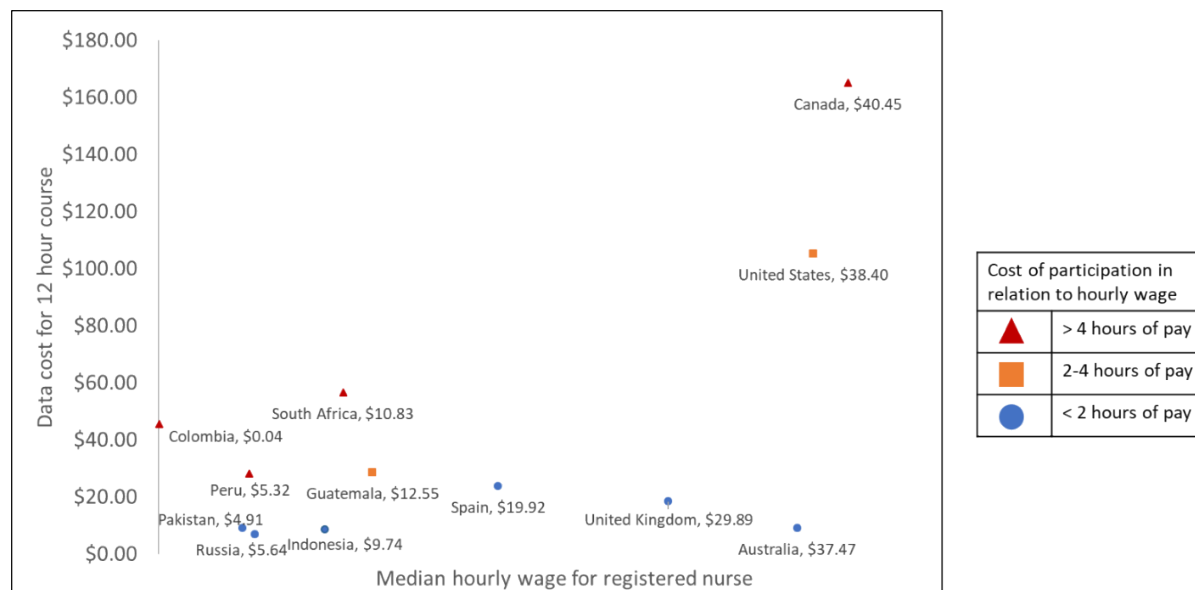

Source: https://medrxiv.org/content/10.1101/2024.08.23.24312503v1.full.pdf
